# Supplementary material for: Isolation and Biosynthetic Analysis of Haliamide, a New PKS-NRPS Hybrid Metabolite from the Marine Myxobacterium Haliangium ochraceum
Source: PubMed Central journal article supplement (PMC6274090; doi:10.3390/molecules21010059), 2016-01-06
Supplement: molecules-21-00059-s001.pdf [file molecules-21-00059-s001.pdf]

# Supplementary Materials: Isolation and Biosynthetic Analysis of Haliamide, a New PKS-NRPS Hybrid Metabolite from the Marine Myxobacterium *Haliangium ochraceum*

Yuwei Sun <sup>1</sup>, Tomohiko Tomura <sup>1</sup>, Junichi Sato <sup>1</sup>, Takashi Iizuka <sup>2</sup>, Ryosuke Fudou <sup>3</sup> and Makoto Ojika <sup>1,\*</sup>

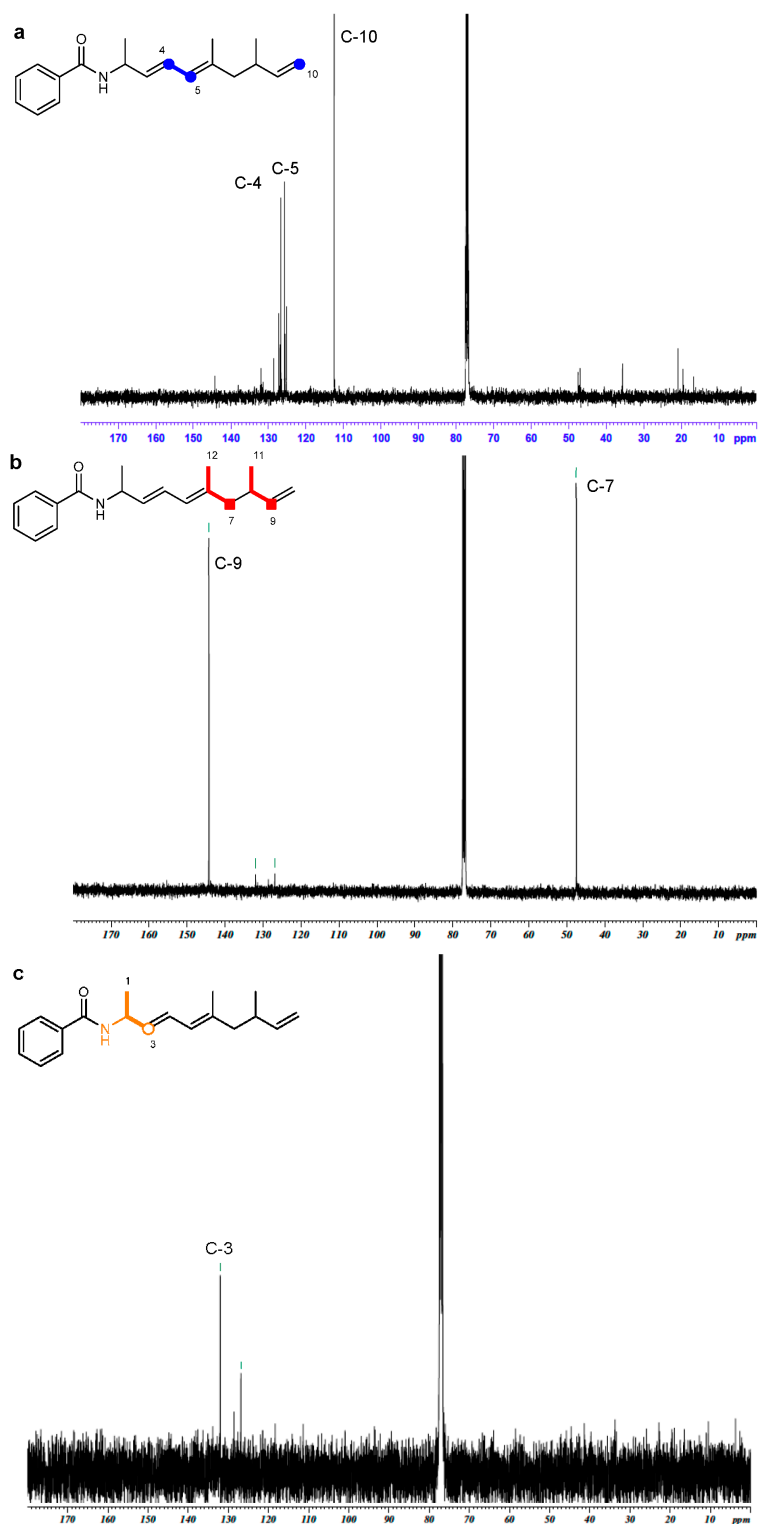

Figure S1. Cont.

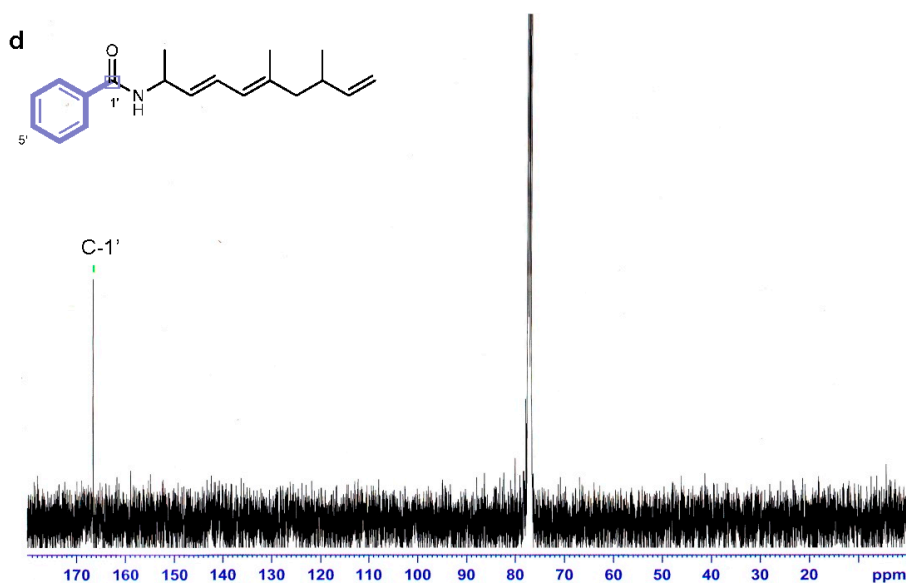

**Figure S1.** Feeding experiments with stable isotope labeled precursors. (a)  $^{13}\text{C}$ -NMR spectrum (100 MHz) of  $[1,2\text{-}^{13}\text{C}_2]$ acetate-labeled haliamide in  $\text{CDCl}_3$ ; (b)  $^{13}\text{C}$ -NMR spectrum (100 MHz) of  $[1\text{-}^{13}\text{C}]$ propionate-labeled haliamide in  $\text{CDCl}_3$ ; (c)  $^{13}\text{C}$ -NMR spectrum (100 MHz) of DL- $[1\text{-}^{13}\text{C}]$ alanine-labeled haliamide in  $\text{CDCl}_3$ ; (d)  $^{13}\text{C}$ -NMR spectrum (100 MHz) of  $[1\text{-}^{13}\text{C}]$ benzoic acid-labeled haliamide in  $\text{CDCl}_3$ .

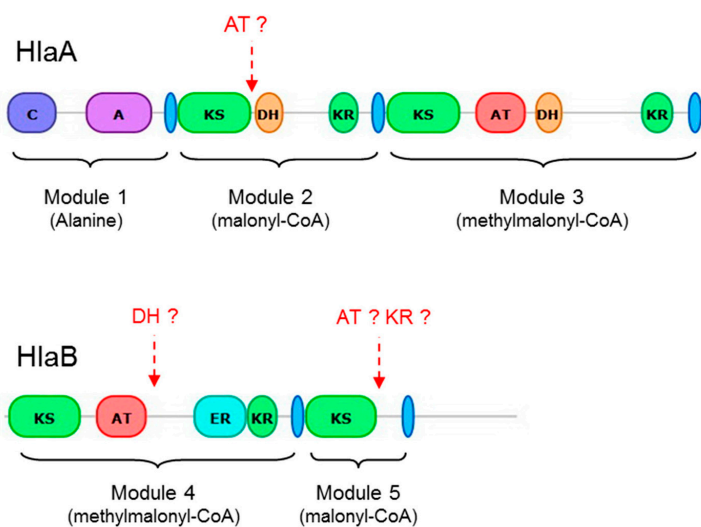

| Gene        | Protein | Length (aa) | Type               | Domain position                                                                                                                                                                                                                                                                                   |
|-------------|---------|-------------|--------------------|---------------------------------------------------------------------------------------------------------------------------------------------------------------------------------------------------------------------------------------------------------------------------------------------------|
| <i>hlaA</i> | HlaA    | 4183        | NRPS-type<br>I PKS | C (11-293), A (477-861), PCP (944-1009), KS <sub>1</sub> (1023-1448), DH <sub>1</sub> (1482-1641), KR <sub>1</sub> (1923-2086), ACP <sub>1</sub> (2175-2245), KS <sub>2</sub> (2266-2690), AT (2793-3081), DH <sub>2</sub> (3148-3299), KR <sub>2</sub> (3779-3956), ACP <sub>2</sub> (4057-4128) |
| <i>hlaB</i> | HlaB    | 3045        | Type I PKS         | KS <sub>1</sub> (31-447), AT (550-840), ER (1131-1433), KR (1447-1616), ACP <sub>1</sub> (1709-1775), KS <sub>2</sub> (1793-2205), ACP <sub>2</sub> (2366-2430)                                                                                                                                   |

**Figure S2.** Detailed annotation of PKS and NRPS by antiSMASH 3.0 analysis. The annotation of HlaA and HlaB revealed 5 modules (1 NRPS and 4 PKSs), while several domains of PKSs are thought to be missing considering the structure of haliamide (1). These domains are AT domains in module 2 and 5, DH in module 4 and KR domain in module 5.

> HlaA\_AT (module 3)  
 FPGQGAQWAGMARELYAREPAFRDALKACDRAIRDEAEWSLIAWLHGEGEAERIDRIQPALFAV  
 MVSLAGLWRDWGYEPAEVVGHSGQGEVAAAYVAGALSLEDAVAIIVRRSAMLRLTSLGRGAMMVV  
 ELTADKAAERIESVRDRVAVAVVNGPRSVVLSGDVEALETGAELEAEGVYQRFVKVDVVASHSPQ  
 MDPIRAKLLGALSEIAPQRGTTPIRSTVSTRTISGEEMDADYWWSNLRRPVRFGAVVEAMAQER  
 DILFLEISAHPLLRPAVEEQAPGRAVSSLRR

(underline: methylmalonate-specific motif)

> HlaB\_AT (module 4)  
 LFTGQGAQRADMGRGLYEHHPGFRETLDRCADALGRAHDLREVMWSSDGRDLRTGWTQPALF  
 ALEVSLAALWRQWGIEPEVLVGHVSGEIAAACVAGVFSIEDGMRLVEARARLMDALPEGGAMVA  
 VRGQPARIERAVASAEGVSVAAFNGPDQVVISGASDAVQALASELAEAGLRAKALTVSHAFHSEL  
 MEPMLEDFRAALRDIRFHPPPLVSNLREGELAGPEVASADYWEHVRAPVRFLEGMRAAHAVG  
 VDHYLEIGPQPVLRCRLGATCVPAGGGETWLPSSLQR

(underline: malonate-specific motif)

> Hoch\_5652 (possible *trans*-AT)  
 MGTALLFPGQGSQKVGMGKALVDAFPAARAVFDEADEALGFAISEVCFEGPADKMLTAYSQPAI  
 LTQSI AVLRAAQAEGRIAQDGEVVAAMGHSLGEFTALVAAGFTLSDAVRLVHLRGQAMQDAVPM  
 GEGGMAALLGLDAEAVQALCDEVAEQVCVPANLNGAGQVVISGHAGAIERAVAAAKGKGAKR  
 AIKLQVSAPFHSPLMQPAAERLAEALDGAIEPLRVPVISNVEAAPNSDAGRVKELLVAQVTGAVR  
 WEESMHALAAMDVVSQGFEGAGKVLRLGLFSRTVKELPVHSLSEPDDIREGSNERGD

(underline: malonate-specific motif)

Figure S3. Sequence of AT domains.

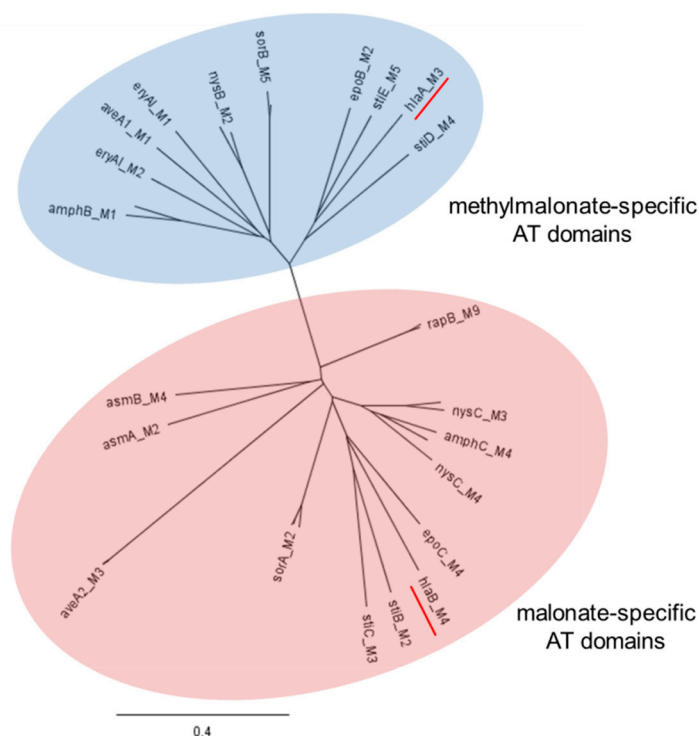

Figure S4. Phylogenetic tree of AT domains of type I PKS from several bacterial metabolites. Thirty three sequences from actinobacteria and proteobacteria were used, including AT domains in the amphotericin B (*amph*), ansamitocin (*asm*), avermectin (*ave*), epothilone (*epo*), erythromycin (*ery*), haliamide (*hla*), nystatin (*nys*), rapamycin (*rap*), soraphen (*sor*) and stigmatellin (*sti*) biosynthetic gene cluster. The AT domains from *hla* cluster are indicated by red underline. The AT domain of module 3 in *hlaA* is grouped in the methylmalonate specific clade, while AT domain of module 4 in *hlaB* is grouped in the malonate specific clade.

**a**

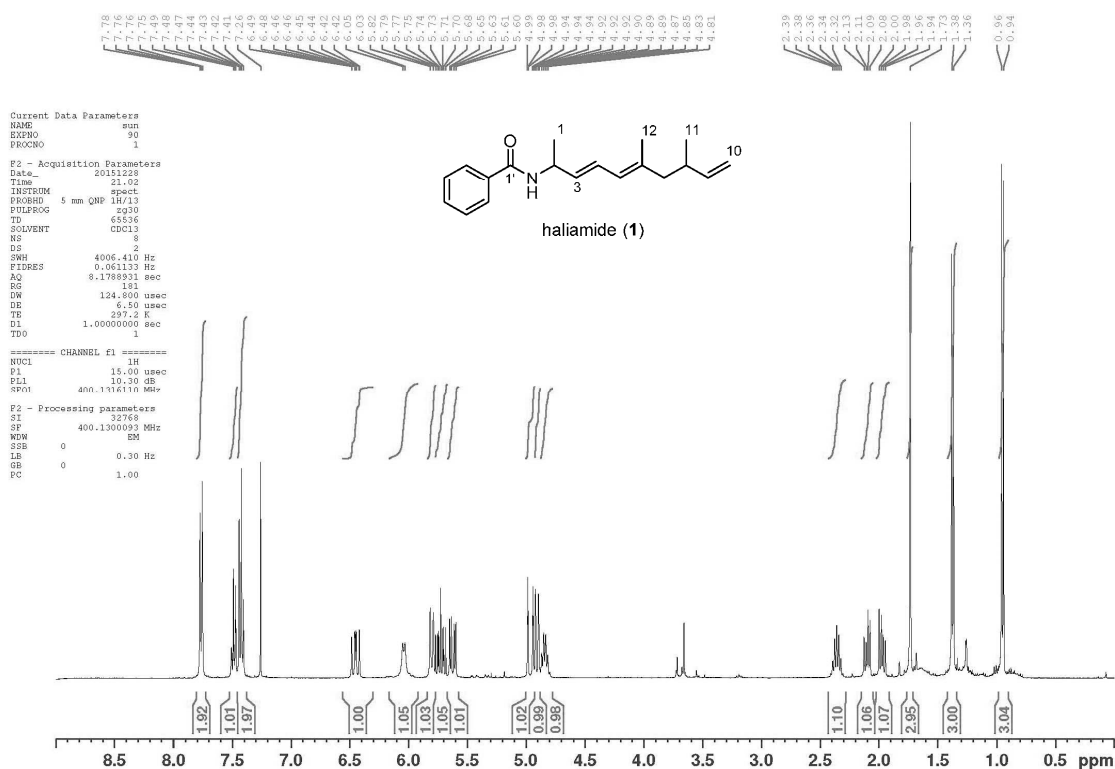

**b**

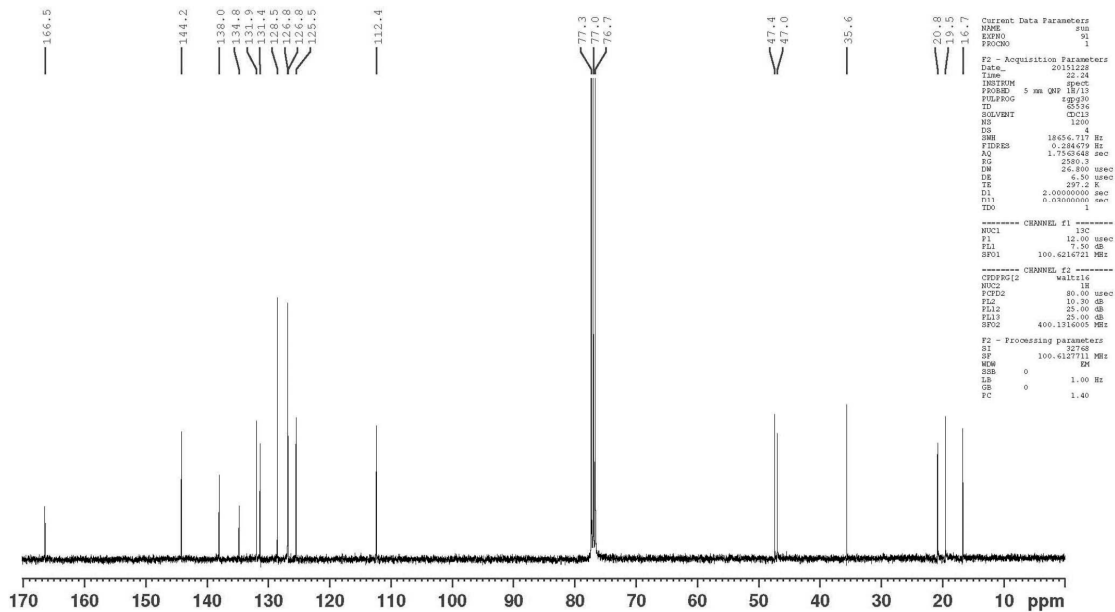

Figure S5. Cont.

**c**

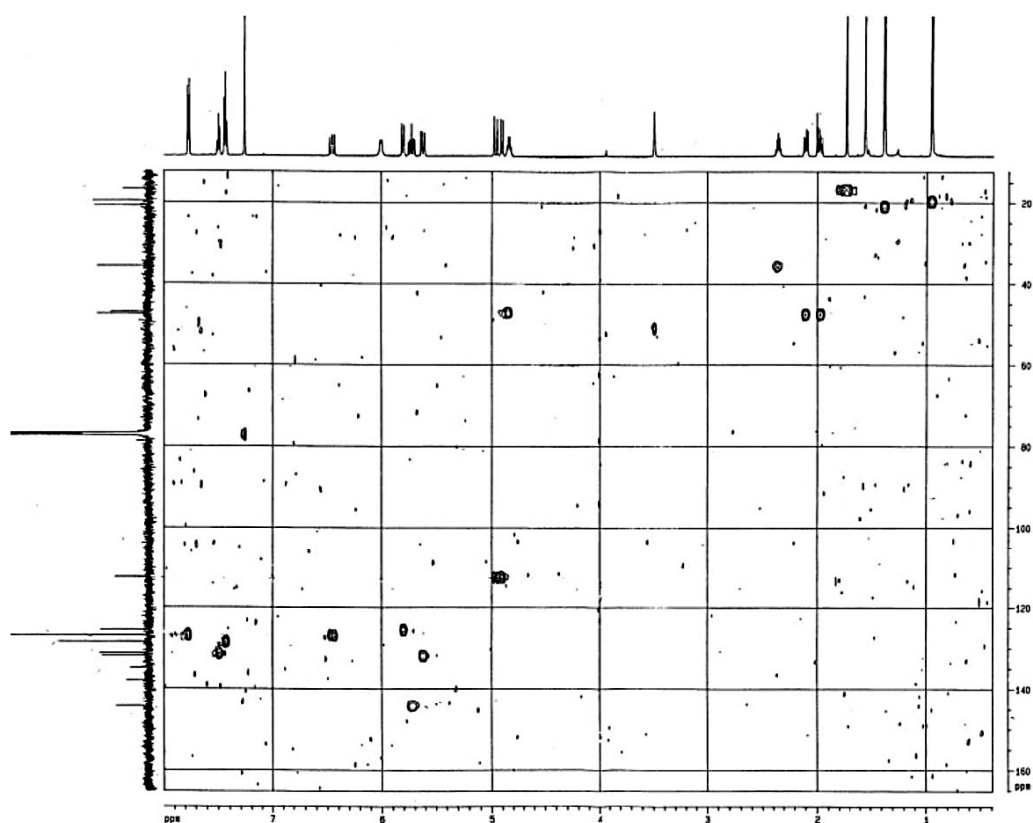

**d**

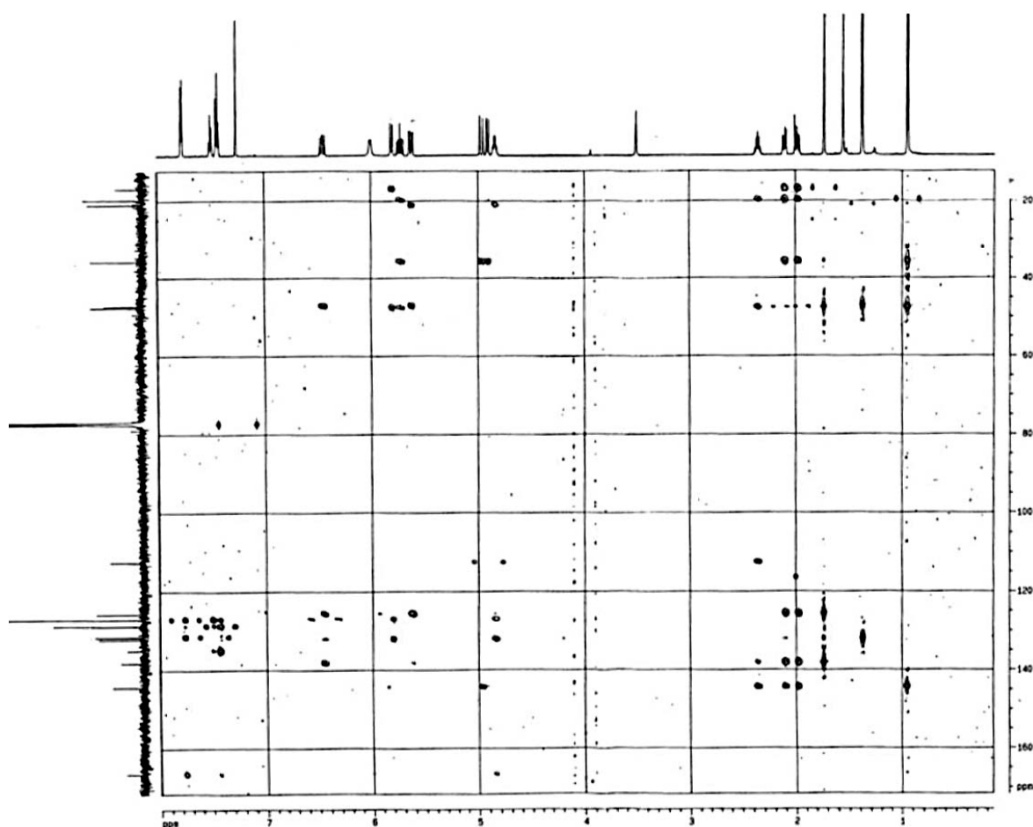

Figure S5. Cont.

**e**

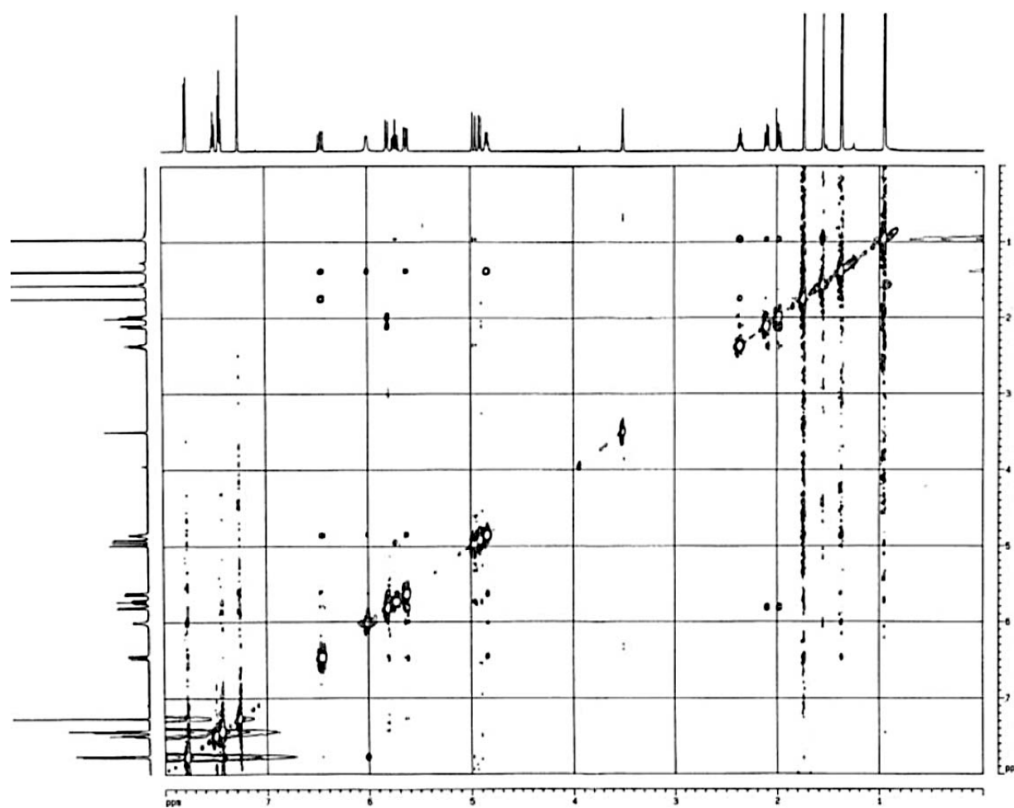

**f**

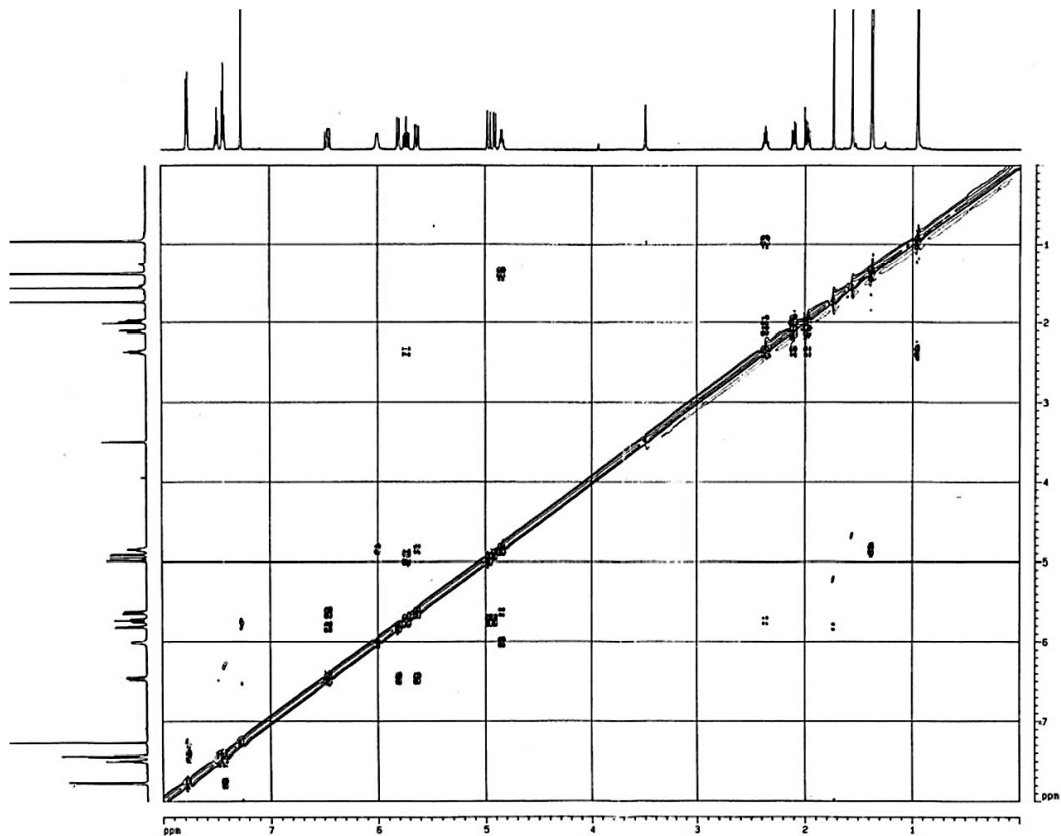

Figure S5. Cont.

**g**

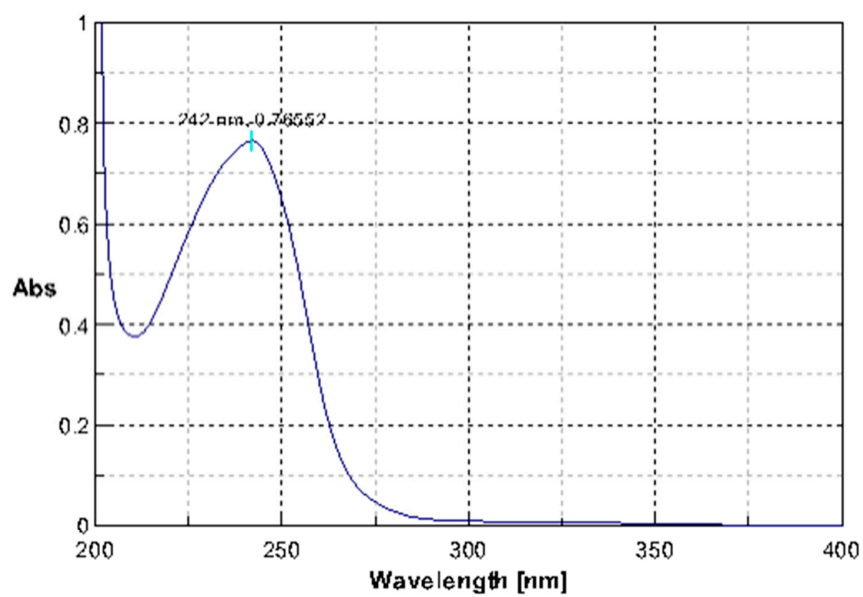

**h**

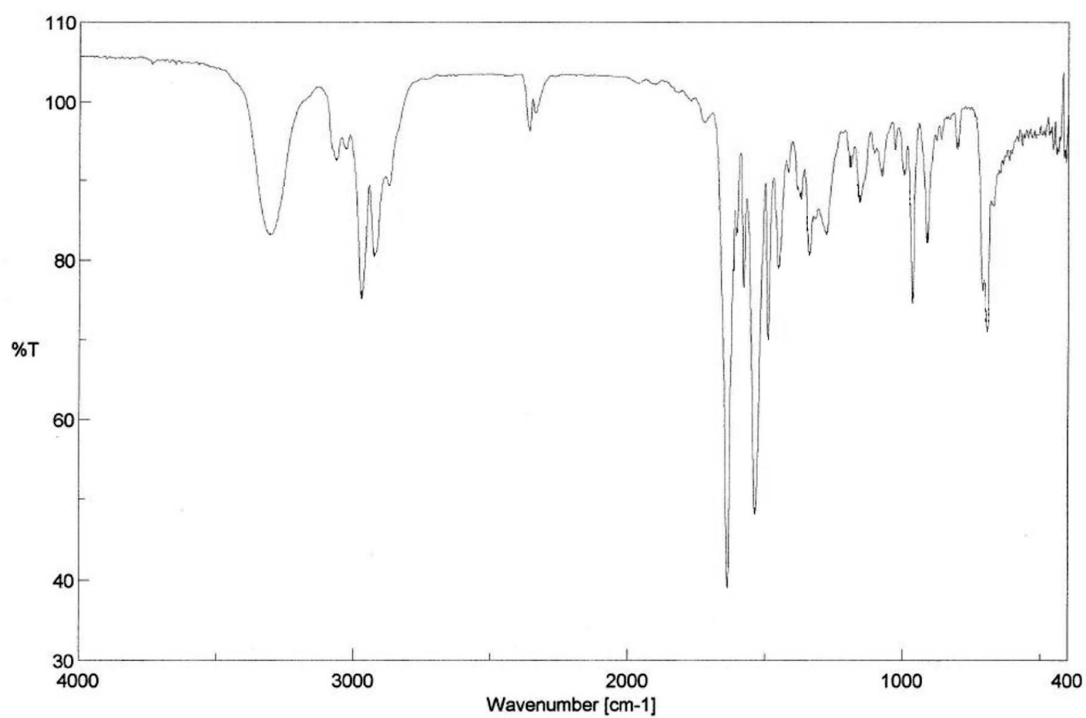

Figure S5. Cont.

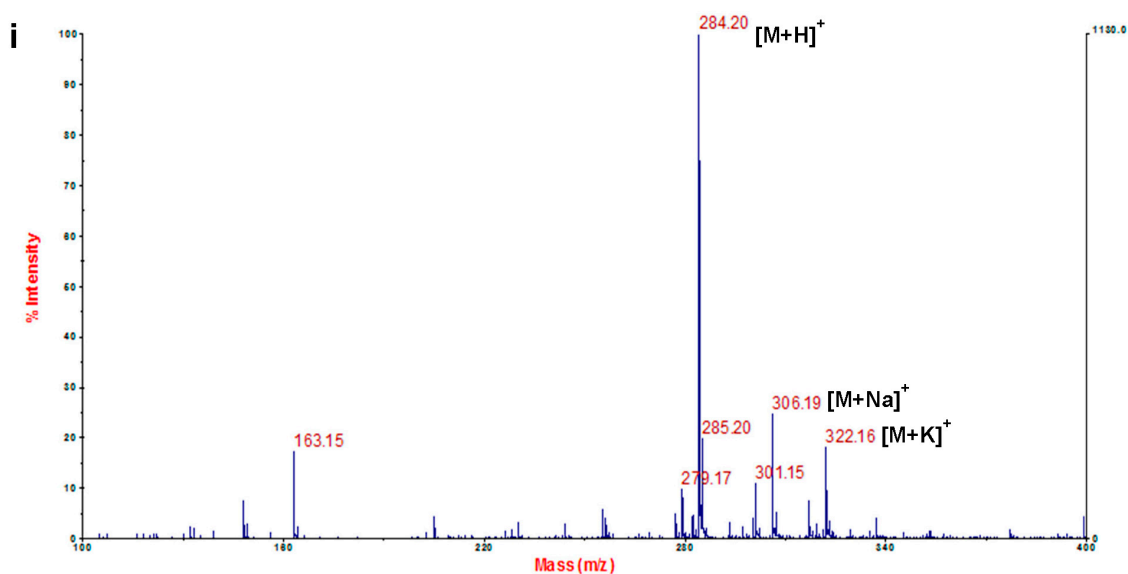

**Figure S5.** Spectra of haliamide (**1**). (a)  $^1\text{H}$ -NMR (400 MHz,  $\text{CDCl}_3$ ); (b)  $^{13}\text{C}$ -NMR (100 MHz,  $\text{CDCl}_3$ ); (c) HMQC; (d) HMBC; (e) NOESY; (f) DQF-COSY; (g) UV; (h) IR; (i) ESI-MS.

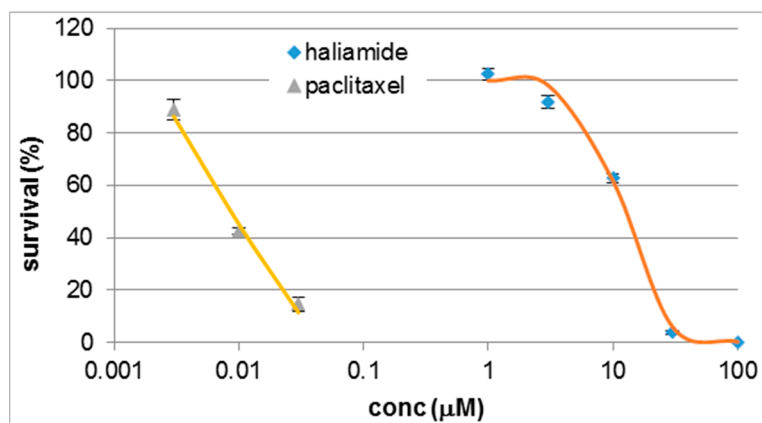

**Figure S6.** Cytotoxicity of haliamide (**1**) against HeLa-S3 cells. Markers indicate average values with SE ( $n = 4$ ), and the lines indicate theoretical sigmoid curves ( $y = 100/(1 + e^{-a(x - b)})$ ,  $x: \log(\mu\text{M})$ ). Paclitaxel is a positive control ( $\text{IC}_{50} = 8.9 \text{ nM}$ ).
